# Supplementary material for: Synthesis of In2O3–In2S3 core–shell nanorods with inverted type-I structure for photocatalytic H2 generation
Source: Royal Society of Chemistry journal article supplement (doi:10.1039/c3cp51722e), 2013-01-01
Supplement: c3cp51722e.pdf [file c3cp51722e.pdf]

# Supporting Information

## Synthesis of $\text{In}_2\text{O}_3/\text{In}_2\text{S}_3$ core/shell nanostructures with inverted type-I heterojunction for photocatalytic $\text{H}_2$ generation

Xia Yang, Jun Xu, Tailun Wong, Qingdan Yang, Chun-Sing Lee\*

Department of Physics and Materials Science and Center of Super-Diamond and Advanced Films (COSDAF), City University of Hong Kong, Hong Kong SAR, People's Republic of China and City University of Hong Kong Shenzhen Research Institute, Shenzhen, People's Republic of China

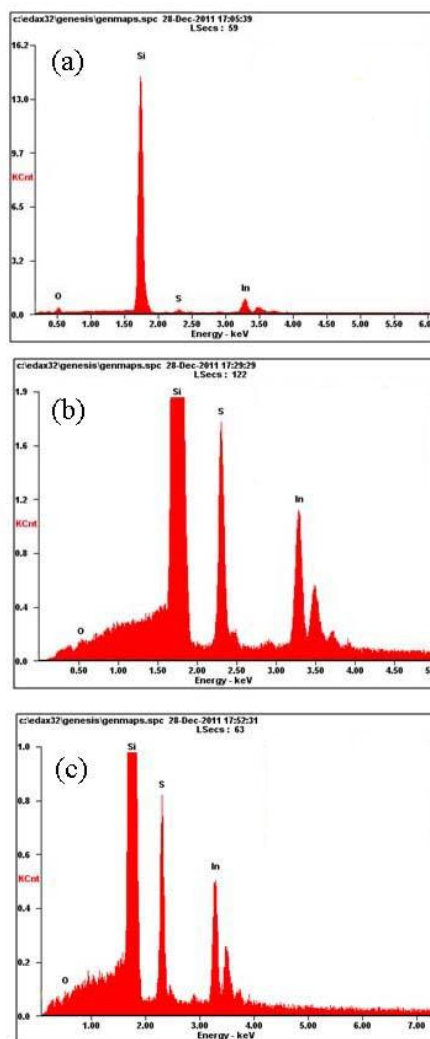

Figure S1. EDS of (a)  $\text{In}_2\text{O}_3/\text{In}_2\text{S}_3$  core/shell structures obtained at 60 °C, (b)  $\text{In}_2\text{O}_3/\text{In}_2\text{S}_3$  core/shell structures obtained at 90 °C, (c) Structures obtained at 120 °C.

\* Corresponding author. Tel.: +852-34427826

E-mail address: [apcslee@cityu.edu.hk](mailto:apcslee@cityu.edu.hk)

**Table S1. Composition of materials obtained at different temperatures**

| Element (At%)<br>Temperature | In  | O    | S   | Si <sup>a</sup> |
|------------------------------|-----|------|-----|-----------------|
| 60 °C                        | 5.4 | 11.1 | 1.5 | 82.0            |
| 90 °C                        | 3.4 | 1.0  | 7.1 | 88.5            |
| 120 °C                       | 2.2 | 0.3  | 8.6 | 89.9            |

<sup>a</sup> Si are from the substrate.

**Table S2. Result of BET surface area for different materials**

| Samples                | In <sub>2</sub> O <sub>3</sub><br>nanorods | Core/shell<br>In <sub>2</sub> O <sub>3</sub> / In <sub>2</sub> S <sub>3</sub> (60 °C) | Core/shell<br>In <sub>2</sub> O <sub>3</sub> / In <sub>2</sub> S <sub>3</sub> (90 °C) | Hollow In <sub>2</sub> S <sub>3</sub><br>(120 °C) |
|------------------------|--------------------------------------------|---------------------------------------------------------------------------------------|---------------------------------------------------------------------------------------|---------------------------------------------------|
| BET(m <sup>2</sup> /g) | 102.9                                      | 111.2                                                                                 | 113.5                                                                                 | 130.9                                             |

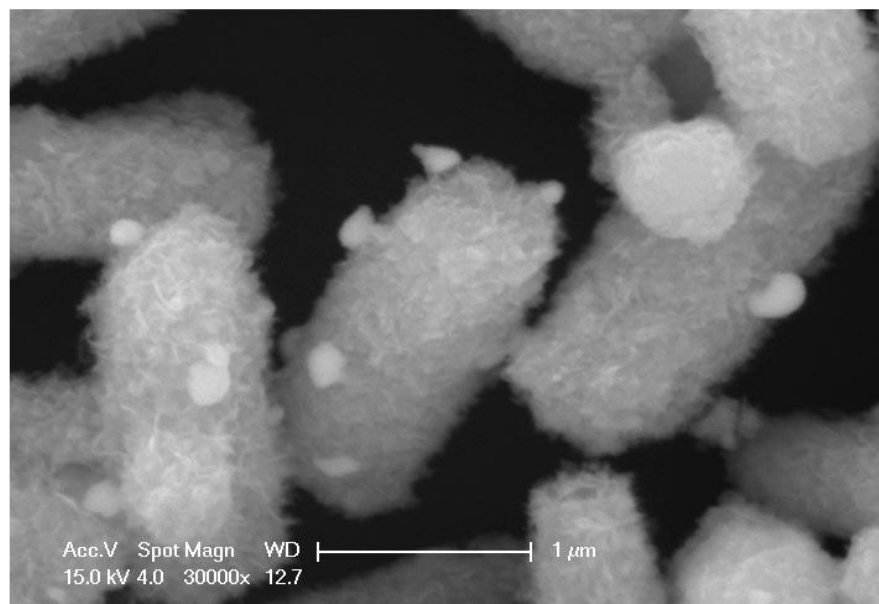

Figure S2. SEM image of 90 °C core/shell In<sub>2</sub>O<sub>3</sub>/In<sub>2</sub>S<sub>3</sub> nanostructures after photo reaction test for 5 runs.

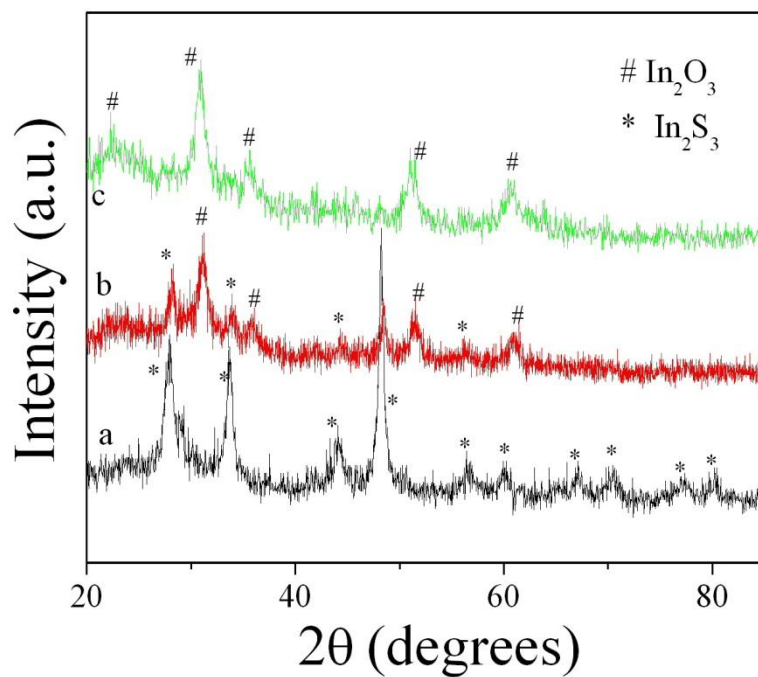

Figure S3. XRD pattern of (a) In<sub>2</sub>S<sub>3</sub> obtained by hydrothermal method at 120 °C, (b) In<sub>2</sub>S<sub>3</sub> sample after heating at 480 °C in air for 20 minutes and (c) In<sub>2</sub>S<sub>3</sub> sample after heating at 480 °C in air for 1 hour. “#” and “\*” are for In<sub>2</sub>O<sub>3</sub> and In<sub>2</sub>S<sub>3</sub>, respectively.

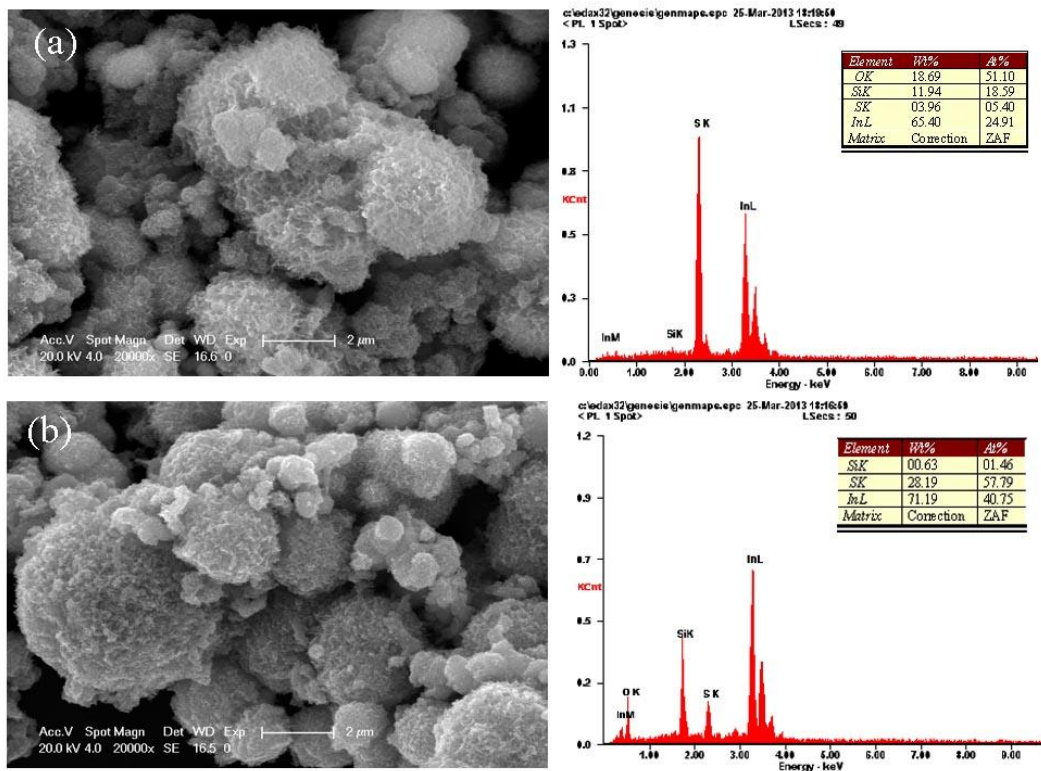

Figure S4. SEM and EDS results for (a)  $\text{In}_2\text{S}_3$  and (b) partially oxidized  $\text{In}_2\text{S}_3$ .

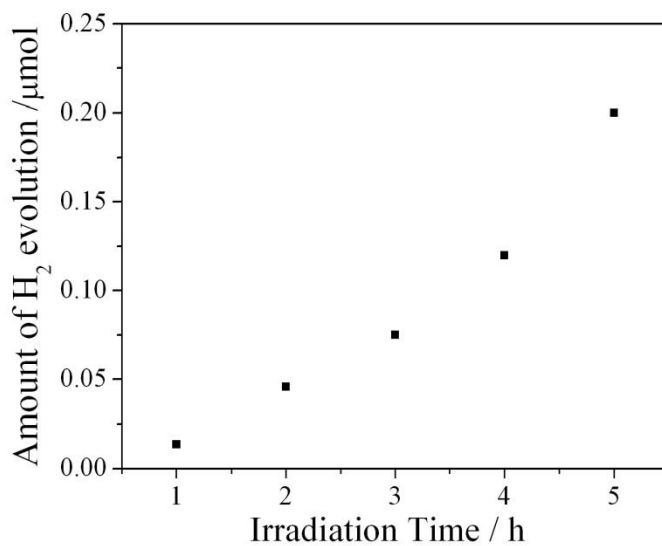

Figure S5. Photocatalytic hydrogen evolution of the partially oxidized  $\text{In}_2\text{S}_3$ .
